# Supplementary material
Source: publisher site journal article supplement (https://www.dovepress.com/article/505751)

Supplementary figure 1. Top 25 Cited Authors with the Strongest Citation Bursts


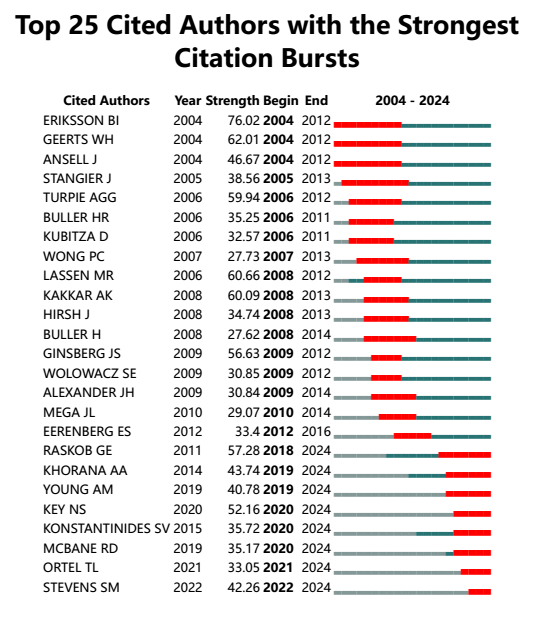


Supplementary figure 2. Top 25 Cited Journals with the Strongest Citation Bursts


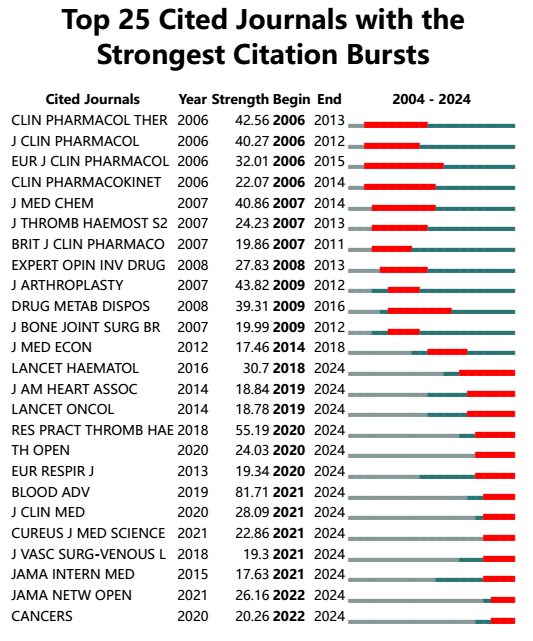


Supplementary figure 3. Top 25 citation bursts of highly cited institutions


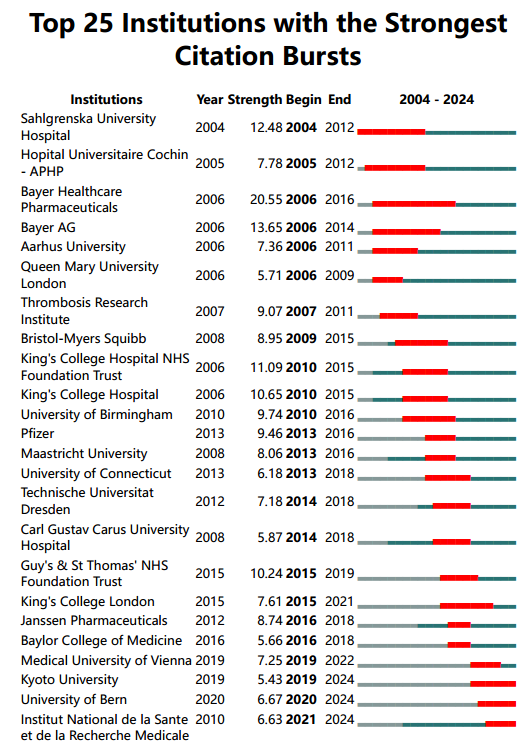


Supplementary figure 4. Top 25 citation bursts of highly cited keywords


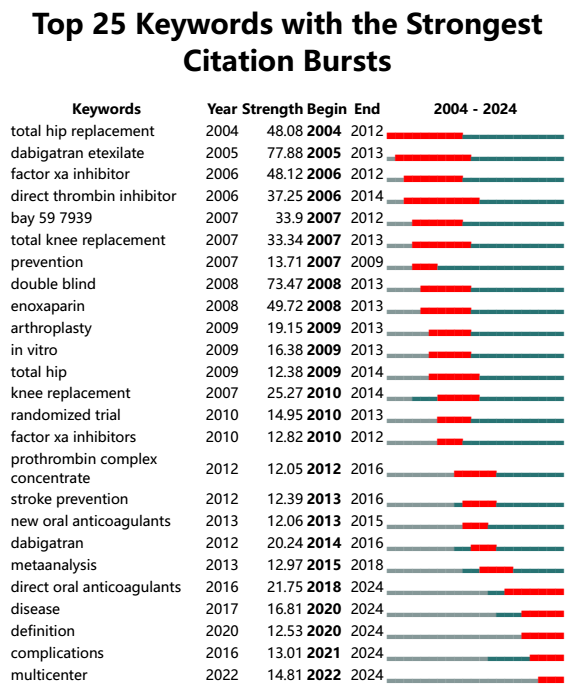


Supplementary figure 5. Top 25 citation bursts of highly cited references


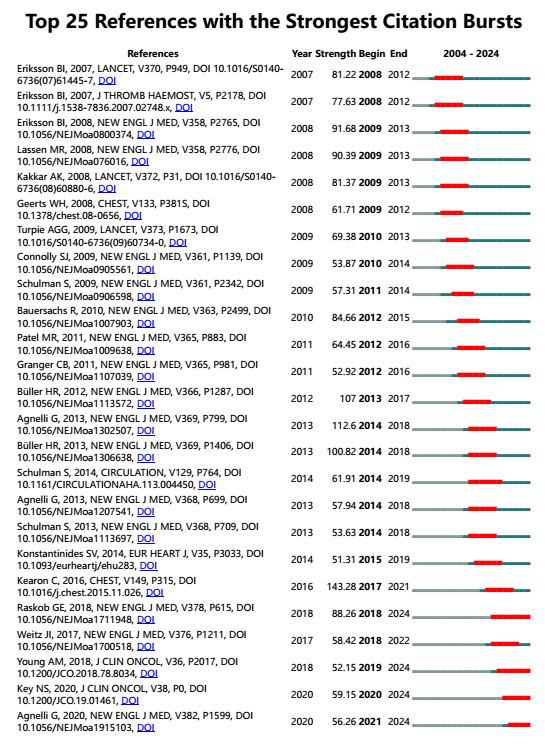

Supplement: Supplementary file 1 [file 13_Mar_2025_Supplementary_files_1_1.docx]
